# Supplementary material
Source: Springer Nature journal article supplement (https://www.springermedizin.de/resource/supplementary/12891_2006_267_MOESM4_ESM.pdf/9510898)
Supplement: MOESM4 [file 9510898]

# Ratings by orthotists & plantar pressure according to GS

number of ratings indicating a region as one with excessively high pressure

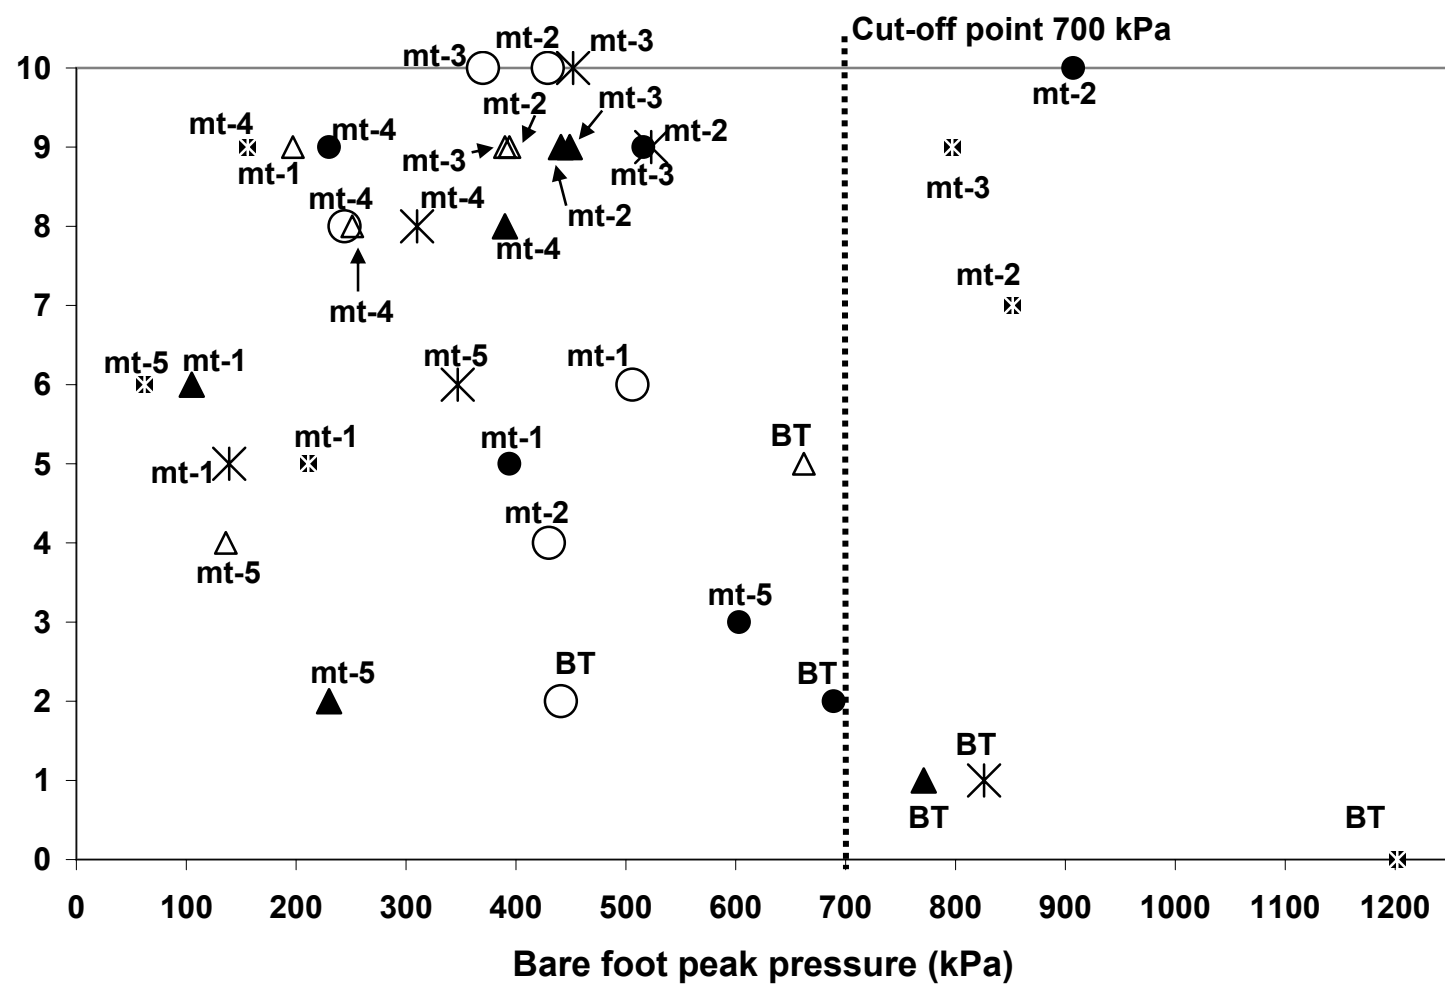

- A left
- A right
- ▲ B left
- △ B right
- ⊗ C left
- ⊗ C right
